# Supplementary material for: Amidation induced self-reduction of p-GO with Lewis-base termination for all-inorganic CsPbIBr2perovskite solar cells
Source: Royal Society of Chemistry journal article supplement (doi:10.1039/d1ta07090h), 2021-01-01
Supplement: d1ta07090h1.pdf [file d1ta07090h1.pdf]

## Supporting Information for

# Amidation Induced Self-Reduction of *p*-GO with Lewis-Base Termination for All-Inorganic CsPbIBr<sub>2</sub> Perovskite Solar Cells

Jian Du,<sup>a,b</sup> Jialong Duan,<sup>a,\*</sup> Qiyao Guo,<sup>a</sup> Yanyan Duan,<sup>c</sup> Xiya Yang,<sup>a</sup> Quanzhu Zhou<sup>d</sup> and Qunwei Tang<sup>a,\*</sup>

<sup>a</sup> College of Information Science and Technology, Jinan University, Guangzhou 510632, PR China;

<sup>b</sup> School of Light Industry and Chemical Engineering, Dalian Polytechnic University, Dalian 116034, China;

<sup>c</sup> State Centre for International Cooperation on Designer Low-Carbon and Environmental Material (SCICDLCEM), School of Materials Science and Engineering, Zhengzhou University Zhengzhou 450001 (P. R. China);

<sup>d</sup> BTR New Material Group Co., Ltd., Shenzhen (China).

\*Corresponding Author. Email address: duanjialong@jnu.edu.cn (J.L. Duan);

tangqunwei@jnu.edu.cn (Q.W. Tang).

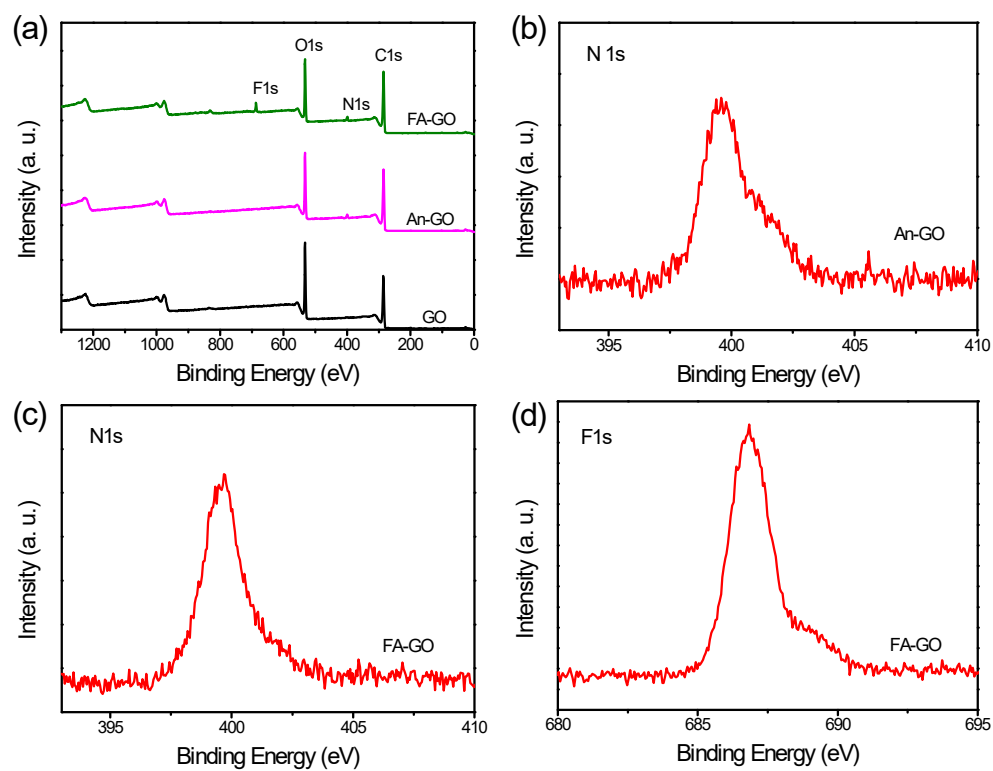

**Fig. S1** (a) XPS survey scans and high-resolution XPS spectra of N 1s and F 1s in (b) An-GO and (c-d) FA-GO.

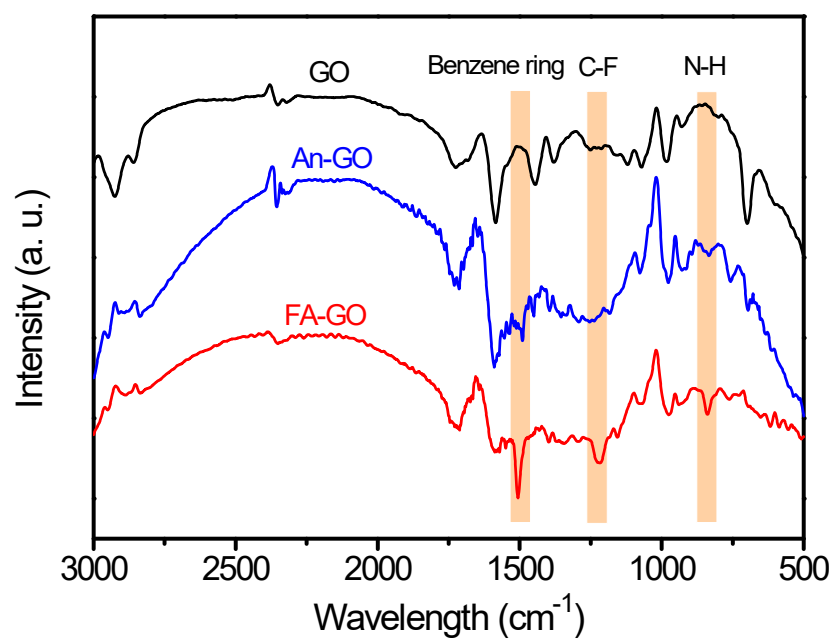

**Fig. S2** FTIR spectra of GO, An-GO and FA-GO samples.

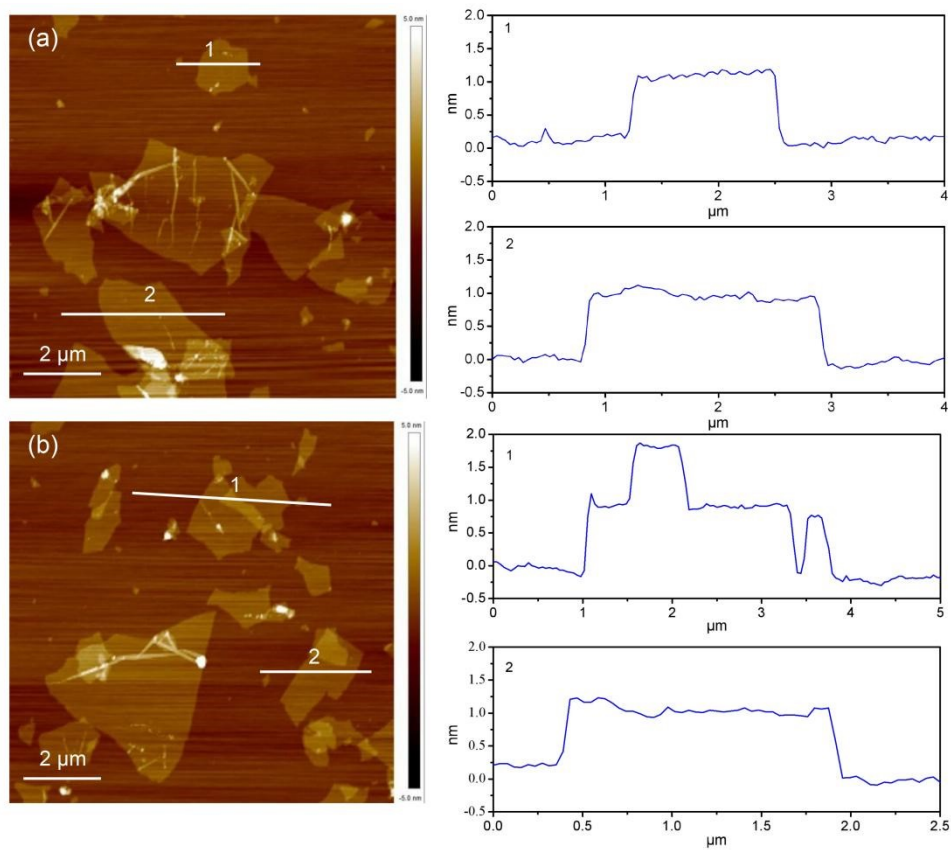

**Fig. S3** AFM images and the corresponding thickness of (a) GO and (b) FA-GO interlayers.

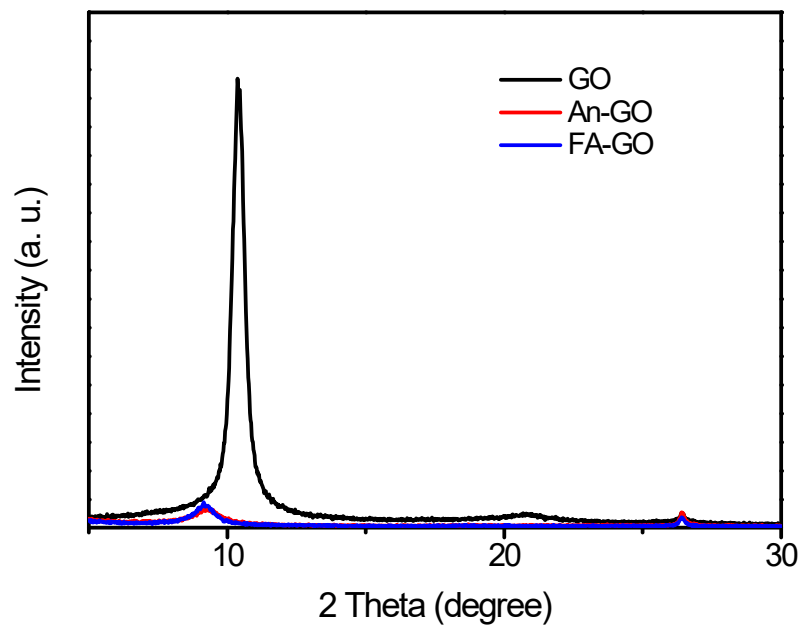

**Fig. S4** XRD patterns of GO, An-GO and FA-GO.

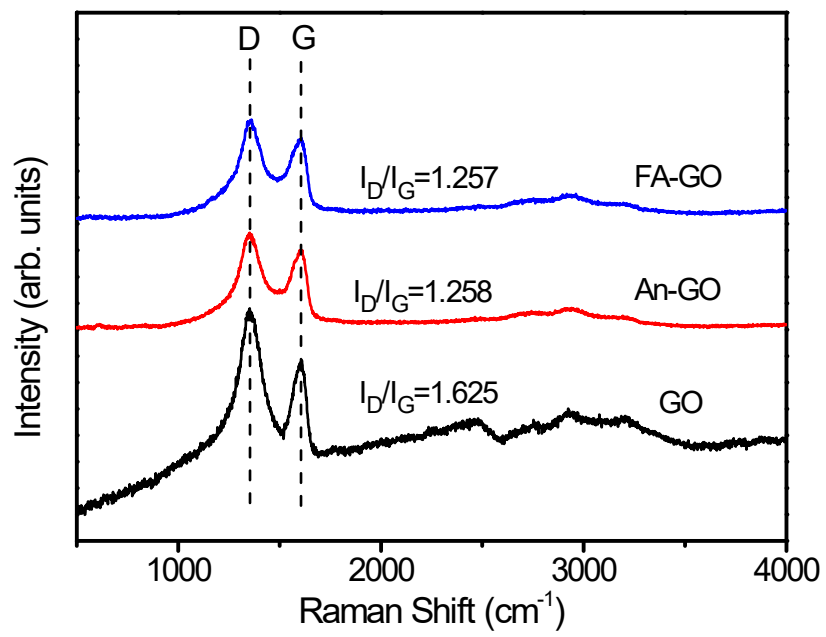

**Fig. S5** Raman spectra of GO, An-GO and FA-GO.

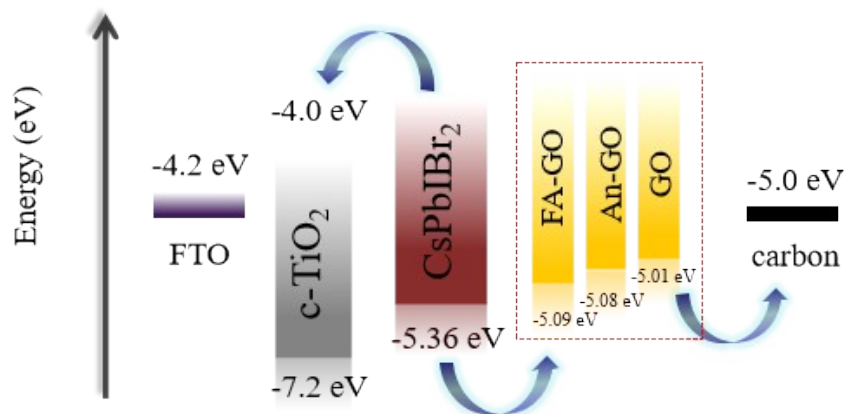

**Fig. S6** Energy-level diagram of CsPbIBr<sub>2</sub> PSC. The energy level of CsPbIBr<sub>2</sub> perovskite film is obtained from previous work.<sup>[S1]</sup>

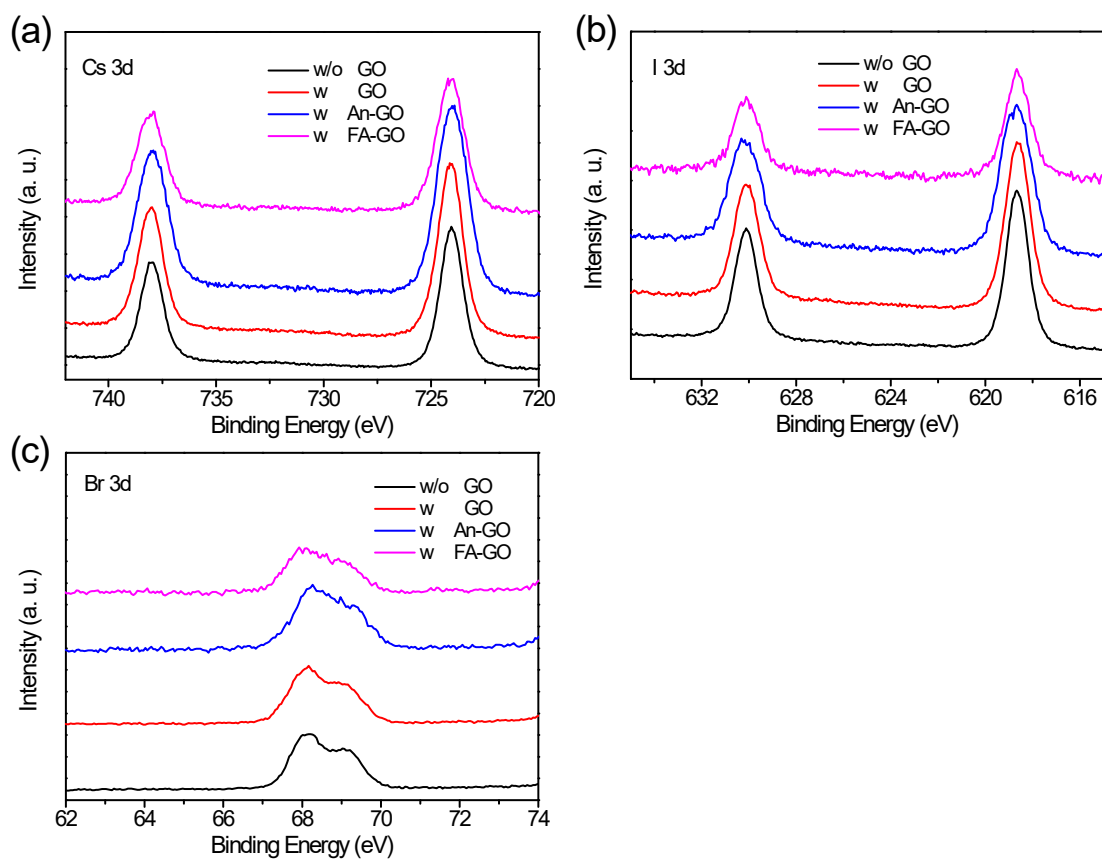

**Fig. S7** XPS spectra of Cs 3d, I 3d and Br 3d in CsPbI<sub>3</sub>, CsPbI<sub>3</sub> + GO, CsPbI<sub>3</sub> + An-GO and CsPbI<sub>3</sub> + FA-GO.



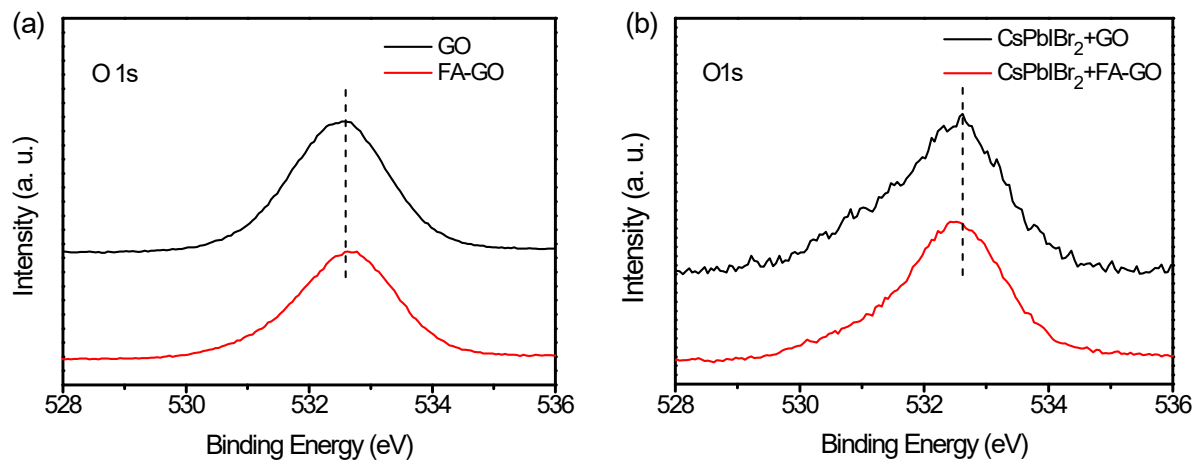

**Fig. S8** High-resolution XPS spectra of O 1s in (a) GO and FA-GO and (b) CsPbIBr<sub>2</sub> + GO and CsPbIBr<sub>2</sub> + FA-GO.

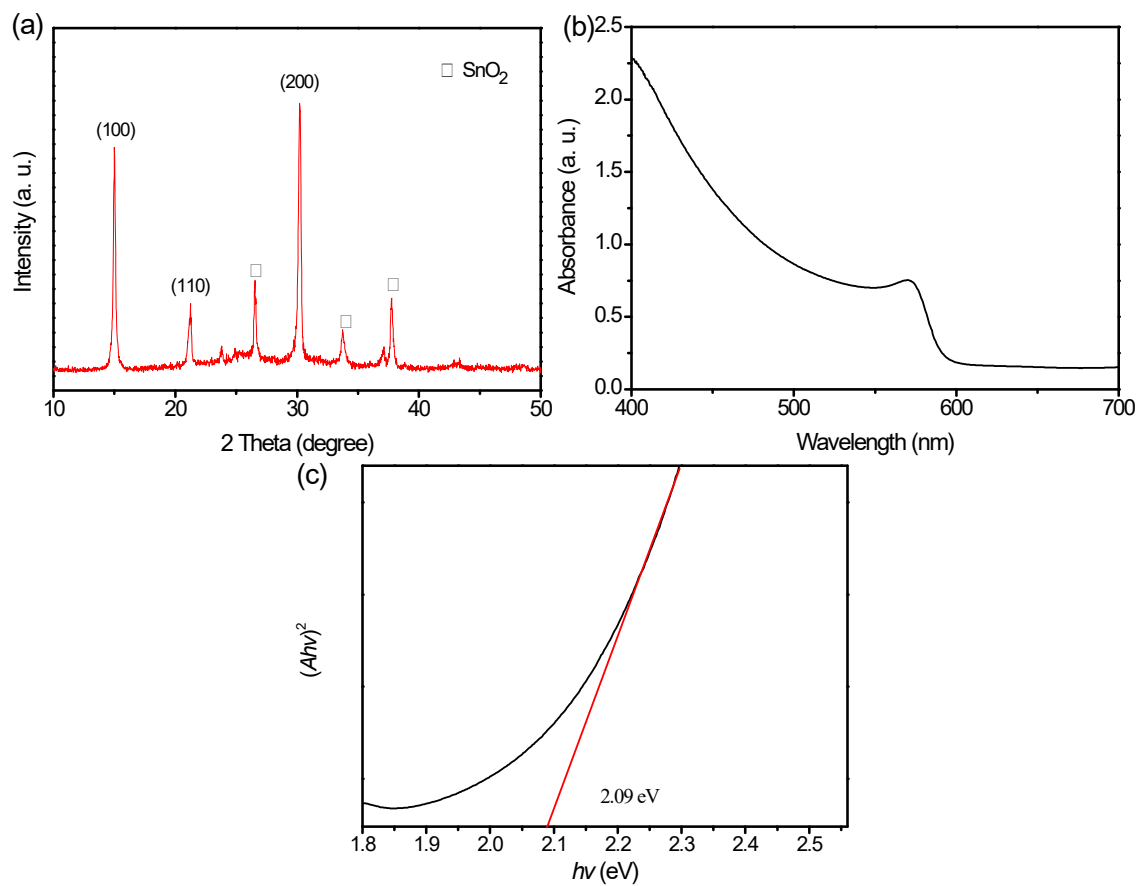

**Fig. S9** (a) XRD pattern of synthesized CsPbIBr<sub>2</sub> film on FTO/*c*-TiO<sub>2</sub> substrate. (b) Optical absorbance of CsPbIBr<sub>2</sub> film. (c) The bandgap of CsPbIBr<sub>2</sub> was calculated to be 2.09 eV.

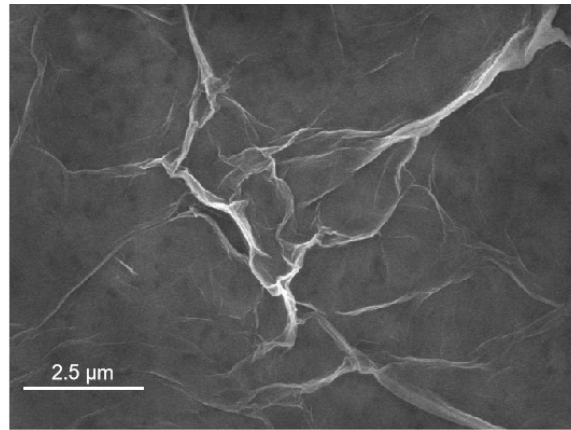

**Fig. S10** SEM image of An-GO covered perovskite film.

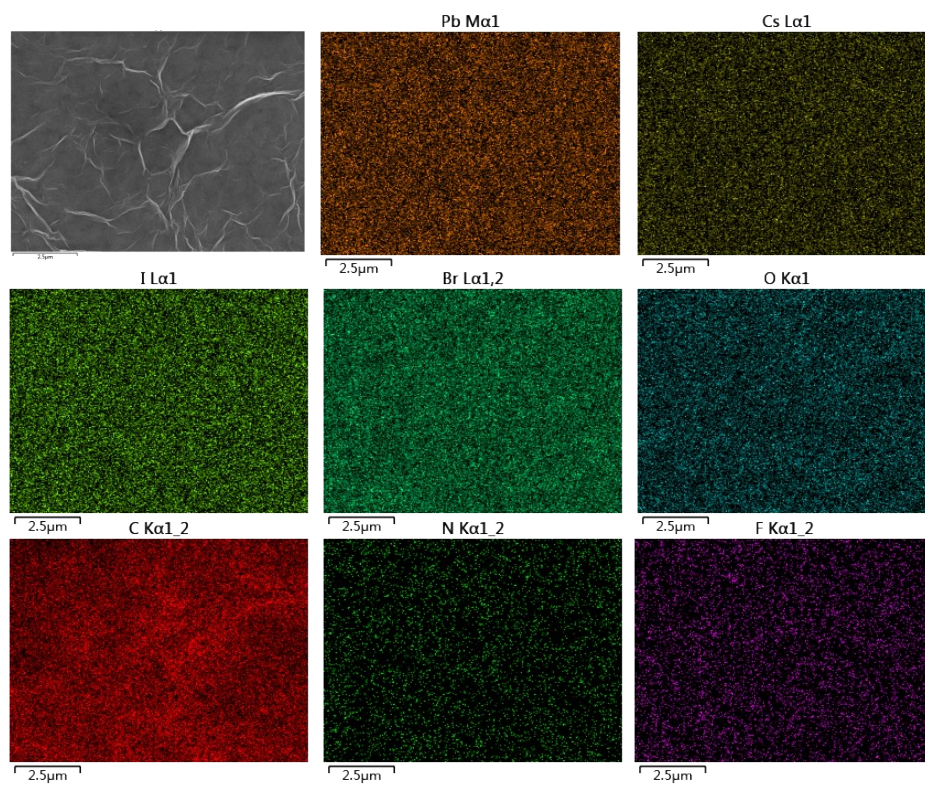

**Fig. S11** The elemental mapping images in CsPbIBr<sub>2</sub> + FA-GO film.

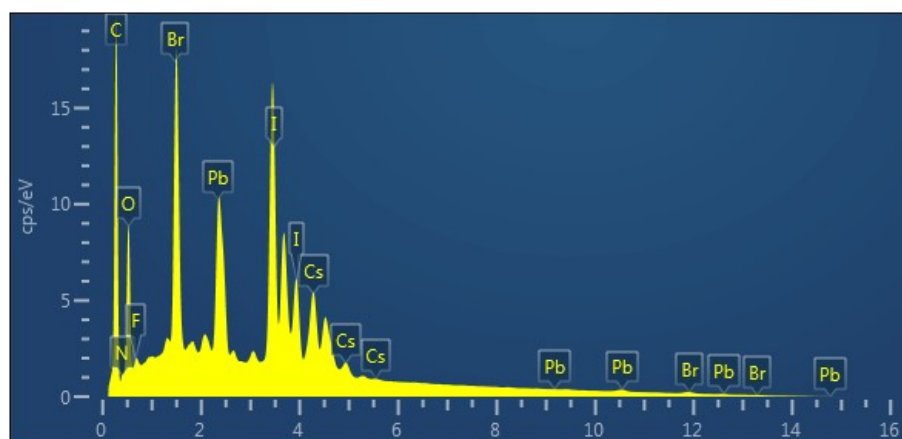

**Fig. S12** EDS spectrum of FA-GO supported on CsPbIBr<sub>2</sub> film.

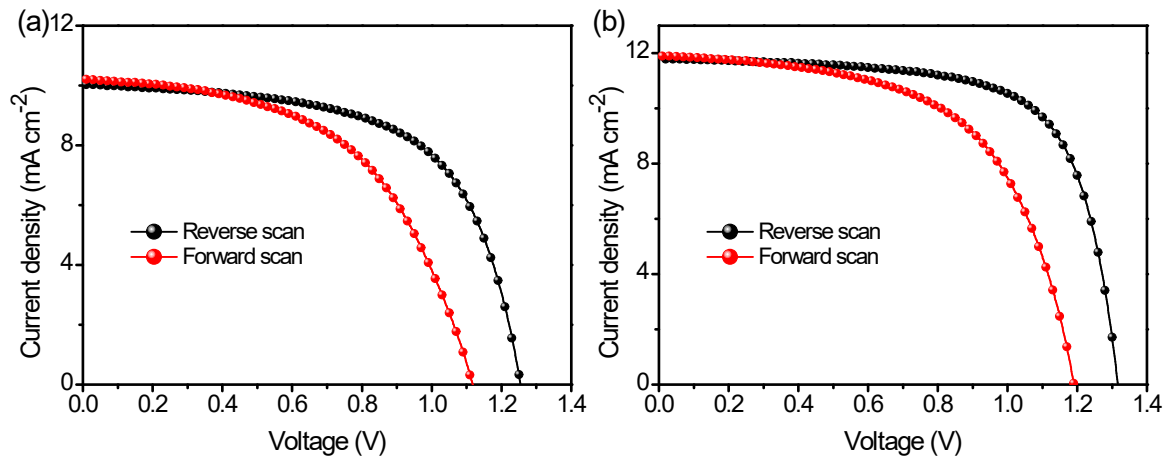

**Fig. S13**  $J$ - $V$  curves of the (a) control and (b) FA-GO tailored PSCs under forward and reverse scan directions.

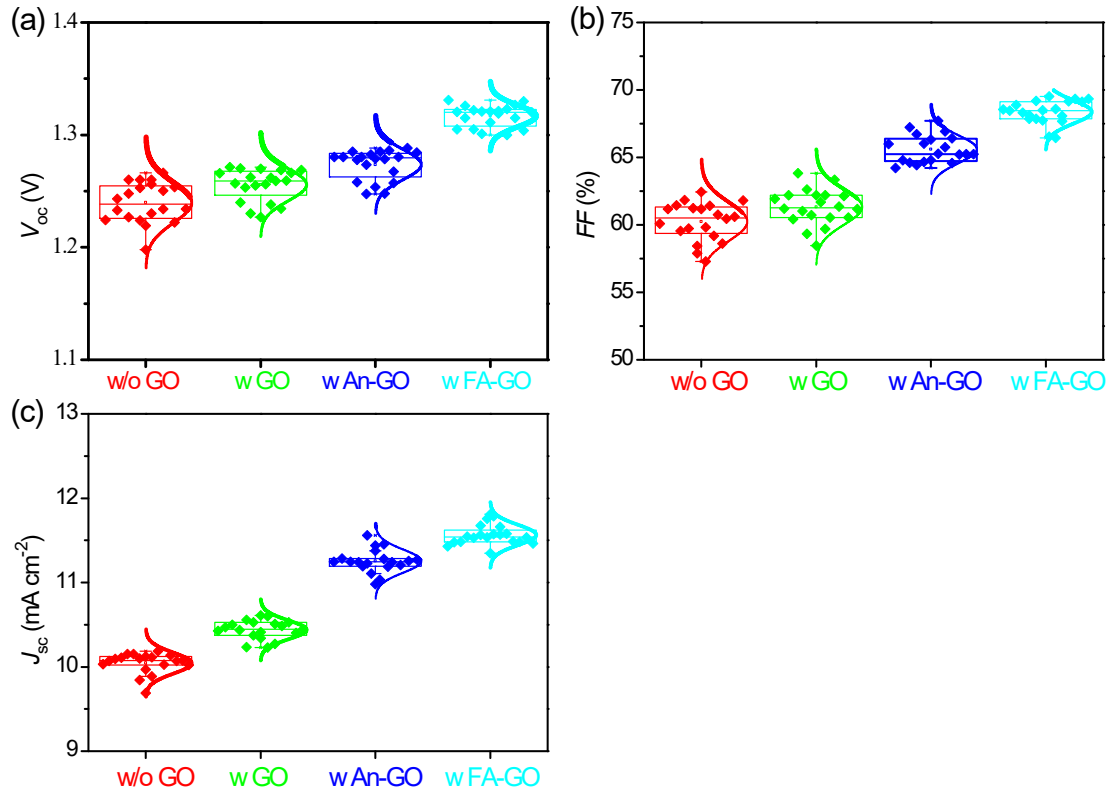

**Fig. S14** Statistical  $V_{oc}$ ,  $FF$  and  $J_{sc}$  distribution of solar cells with and without treatment.

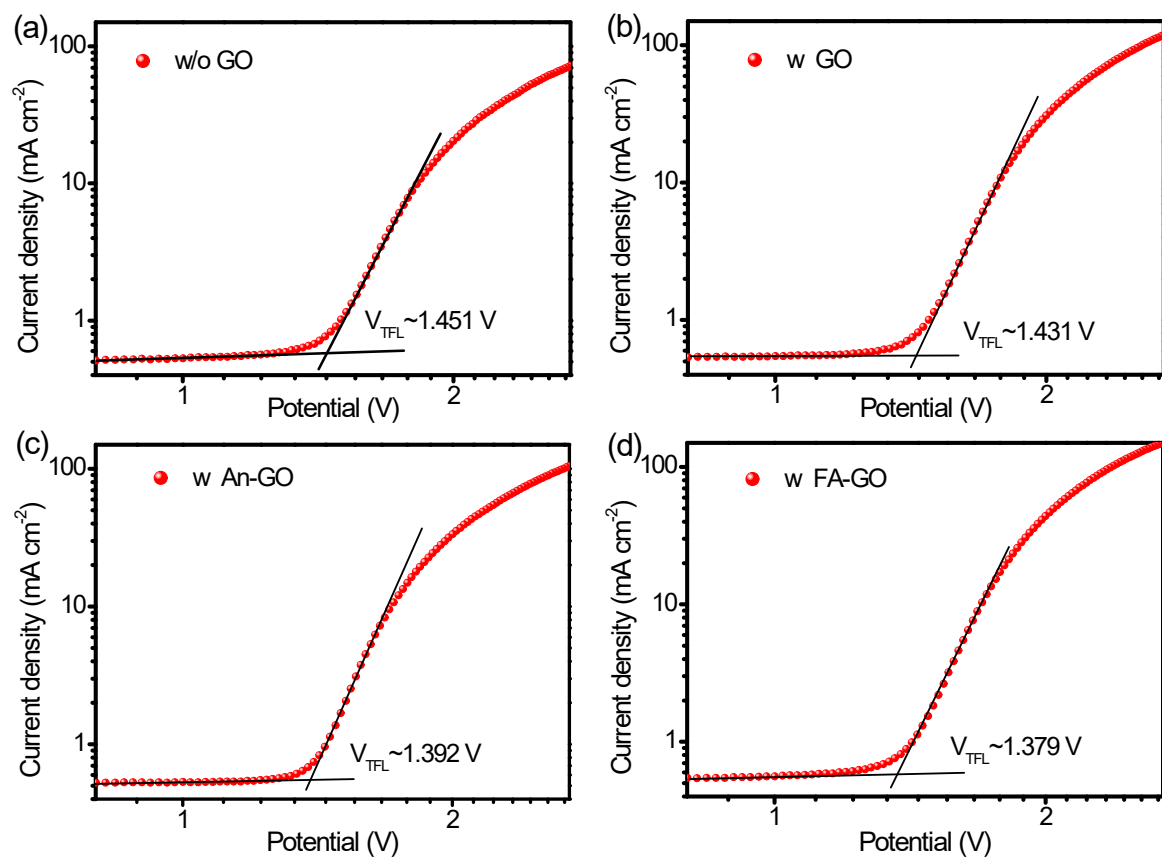

**Fig. S15** Dark current curves for the electron-only devices of perovskite films with and without GO.



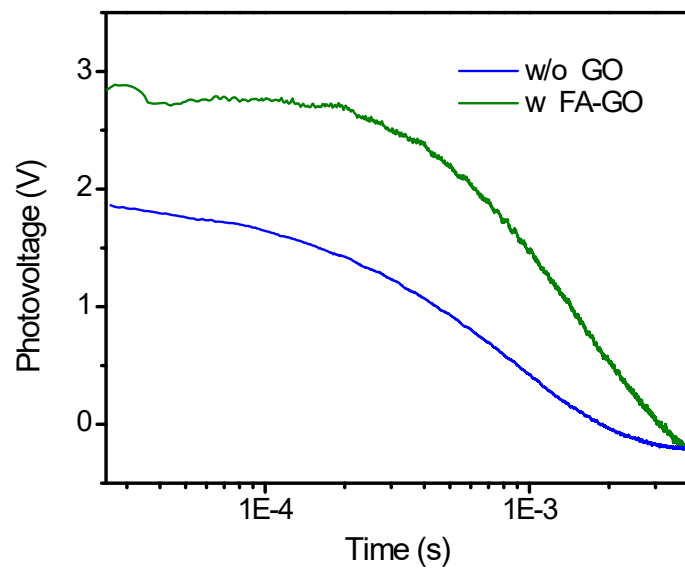

**Fig. S16** Transient photovoltage of fabricated CsPbI<sub>3</sub>Br<sub>2</sub> films with and without FA-GO.

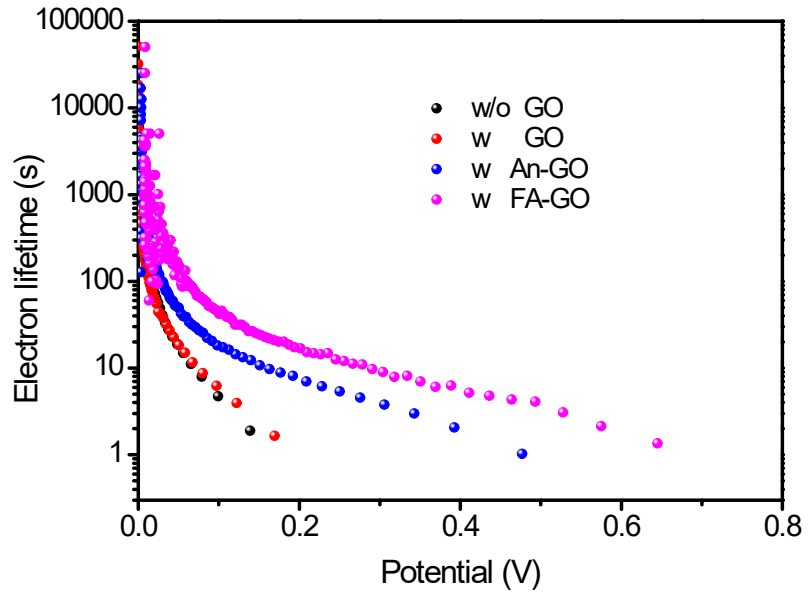

**Fig. S17** Electron lifetime calculated from  $V_{oc}$  decay curves of various devices.

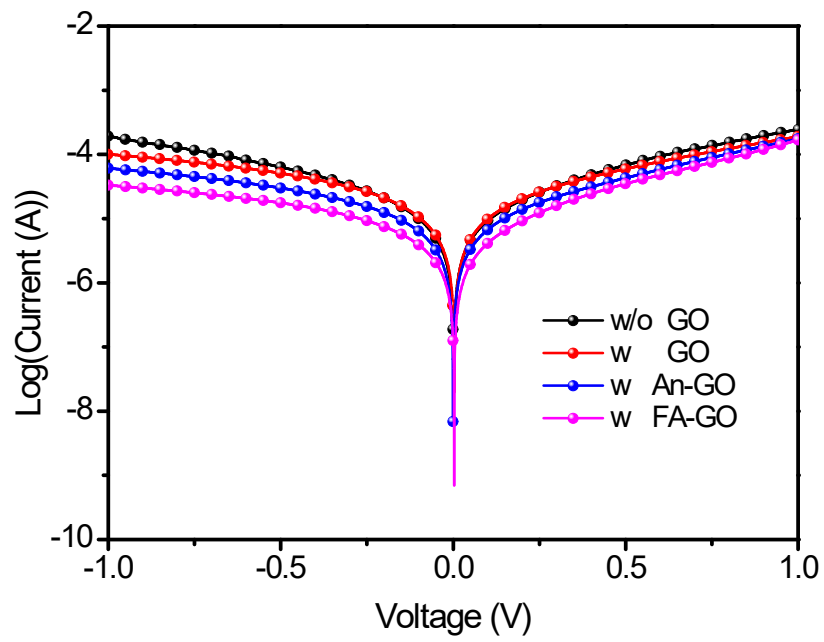

**Fig. S18** Dark  $J-V$  curves of devices with and without GO.

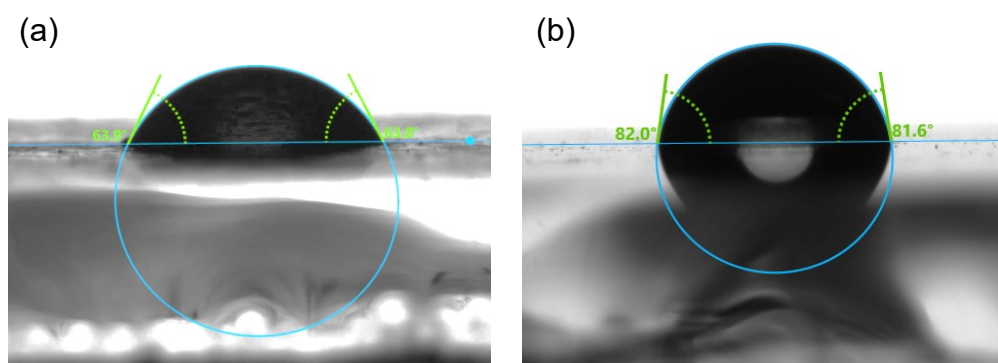

**Fig. S19** Contact angles of CsPbIBr<sub>2</sub> and CsPbIBr<sub>2</sub>/FA-GO films.

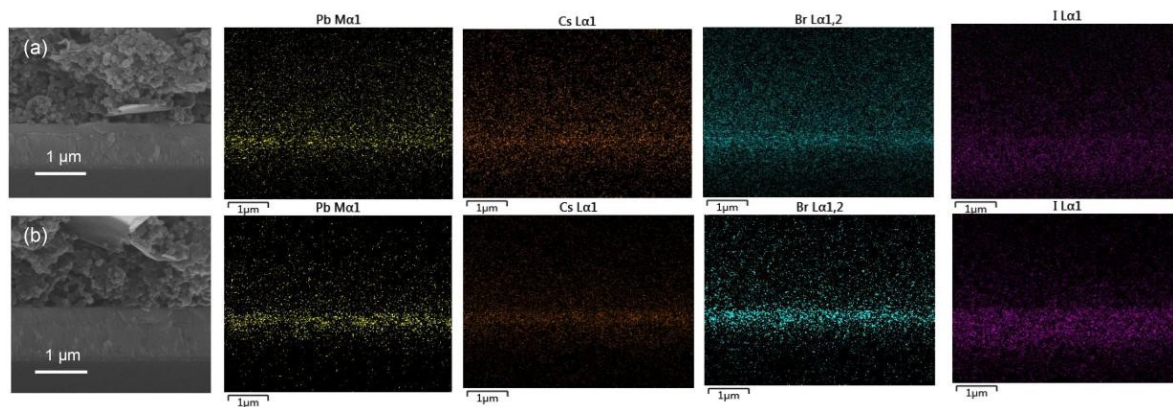

**Fig. S20** Cross-sectional SEM images and corresponding elemental mapping images of the whole devices (a) without and (b) with FA-GO after aging treatment at 150 °C for 24 h.

**Table S1.** Summary of photovoltaic parameters for state-of-the-art CsPbIBr<sub>2</sub> PSCs.

| Devices                                                                                                             | $V_{oc}$<br>(V) | $J_{sc}$ (mA cm <sup>-2</sup> ) | $FF$ (%)     | PCE<br>(%)   | Ref.             |
|---------------------------------------------------------------------------------------------------------------------|-----------------|---------------------------------|--------------|--------------|------------------|
| <b>FTO/<i>c</i>-TiO<sub>2</sub>/CsPbIBr<sub>2</sub>/FA-GO/Carbon</b>                                                | <b>1.318</b>    | <b>11.87</b>                    | <b>70.84</b> | <b>11.08</b> | <b>This work</b> |
| FTO/TiO <sub>2</sub> /CsPbIBr <sub>2</sub> /Spiro-OMeTAD/Au                                                         | 1.12            | 11.65                           | 72.39        | 9.44         | [S2]             |
| FTO/TiO <sub>2</sub> /CsPbIBr <sub>2</sub> /carbon                                                                  | 1.08            | 10.88                           | 64           | 7.52         | [S3]             |
| FTO/ <i>c</i> -TiO <sub>2</sub> /CsPb <sub>0.99</sub> Zn <sub>0.01</sub> IBr <sub>2</sub> /Spiro-OMeTAD/Ag          | 1.28            | 11.92                           | 69           | 10.16        | [S4]             |
| FTO/SnO <sub>2</sub> /CsPbIBr <sub>2</sub> /carbon                                                                  | 1.19            | 9.76                            | 57           | 6.79         | [S5]             |
| FTO/ <i>c</i> -TiO <sub>2</sub> /CsPbI <sub>1+x</sub> Br <sub>2-x</sub> /carbon                                     | 1.186           | 12.3                            | 75           | 10.94        | [S6]             |
| FTO/SnO <sub>2</sub> /CsPbIBr <sub>2</sub> -PEI/CsPbIBr <sub>2</sub> -MA/CsPbIBr <sub>2</sub> /NiO <sub>x</sub> /Ag | 1.25            | 13.30                           | 68           | 11.30        | [S7]             |
| FTO/ <i>c</i> -TiO <sub>2</sub> /CsPbIBr <sub>2</sub> /Carbon                                                       | 1.338           | 11.73                           | 65           | 10.20        | [S8]             |
| FTO/TiO <sub>2</sub> /SmBr <sub>3</sub> /Sm-doped CsPbIBr <sub>2</sub> /Spiro-OMETAD/Au                             | 1.17            | -                               | -            | 10.88        | [S9]             |
| FTO/ <i>c</i> -TiO <sub>2</sub> /CsBr/CsPbIBr <sub>2</sub> /Carbon                                                  | 1.26            | 11.80                           | 72           | 10.71        | [S10]            |
| ITO/Cl-TiO <sub>2</sub> /CsPbIBr <sub>2</sub> /BHJ-2/MoO <sub>3</sub> /Al                                           | 1.22            | 12.50                           | 72.66        | 11.08        | [S11]            |
| FTO/ TiO <sub>2</sub> /CsPbIBr <sub>2</sub> /PCBM/Ag                                                                | 1.25            | 11.63                           | 74           | 10.78        | [S12]            |
| FTO/TiO <sub>2</sub> /CsPbIBr <sub>2</sub> /PCBM/Ag                                                                 | 1.21            | 11.58                           | 69           | 10.48        | [S13]            |
| FTO/ <i>c</i> -TiO <sub>2</sub> /CsPbIBr <sub>2</sub> /Spiro-OMeTAD/Au                                              | 1.10            | 12.03                           | 65.40        | 8.65         | [S14]            |
| ITO/SnO <sub>2</sub> /bulk CsPbIBr <sub>2</sub> /QDs CsPbIBr <sub>2</sub> /Spiro-OMeTAD/Au                          | 1.22            | 9.41                            | 71.36        | 8.16         | [S15]            |
| ITO/SnO <sub>2</sub> /CsPbIBr <sub>2</sub> /Spiro-OMeTAD/Au                                                         | 1.27            | 9.21                            | 71.80        | 8.43         | [S16]            |
| FTO/ <i>c</i> -TiO <sub>2</sub> /CsPbIBr <sub>2</sub> /Carbon                                                       | 1.14            | 9.11                            | 63           | 6.55         | [S17]            |

**Table S2.** FWHM data of GO, An-GO and FA-GO.

---

| Samples | FWHM |
|---------|------|
| GO      | 0.48 |
| An-GO   | 0.71 |
| FA-GO   | 0.71 |

---

**Table S3.** TRPL decay parameters of various perovskite films.

---

| Device  | $\tau_1$ | $a_1$  | $\tau_2$ | $a_2$  | $\tau_{ave}$ (ns) |
|---------|----------|--------|----------|--------|-------------------|
| w/o GO  | 0.3244   | 24.75% | 6.7256   | 75.25% | 1.143             |
| w GO    | 0.3081   | 38.92% | 7.91688  | 61.08% | 0.746             |
| w An-GO | 0.2719   | 48.88% | 6.3677   | 51.12% | 0.532             |
| w FA-GO | 0.1535   | 55.08% | 3.7687   | 44.92% | 0.269             |

---



## References

- [S1] Y. You, W. Tian, M. Wang, F. Cao, H. Sun, L. Li, *Adv. Mater. Interfaces* 2020, 7, 2000537.
- [S2] Z. Chen, Q. Wang, Y. Xu, R. Zhou, L. Zhang, Y. Huang, L. Hu, M. Lyu, J. Zhu, *ACS Appl. Mater. Interfaces*, 2021, DOI: 10.1021/acsami.1c02377.
- [S3] J. Liu, Q. He, J. Bi, M. Lei, W. Zhang, G. Wang, *Chem. Eng.* 2021, J. DOI: 10.1016/j.cej.2021.130324.
- [S4] Y. Long, C. Wang, X. Liu, J. Wang, S. Fu, J. Zhang, Z. Hu, Y. Zhu, *J. Mater. Chem. C*, 2021, 9, 2145.
- [S5] R. Wang, H. Zhang, S. Han, Y. Wu, Z. Hu, G. Zhang, H. Liu, Q. He, X. Zhang, *New J. Chem.*, 2021, 45, 9243.
- [S6] Z. Zhang, D. Chen, W. Zhu, J. Ma, W. Chai, D. Chen, J. Zhang, C. Zhang, Y. Hao, *Sci. China Mater.* 2021, DOI: 10.1007/s40843-020-1618-x.
- [S7] B. Gao, J. Meng, *ACS Appl. Energy Mater.* 2020, 3, 8249-8256.
- [S8] W. Zhu, Z. Zhang, D. Chen, W. Chai, D. Chen, J. Zhang, C. Zhang, Y. Hao, *Nano-Micro Lett.* 2020, 12, 87.
- [S9] W. S. Subhani, K. Wang, M. Du, X. Wang, S. Liu, *Adv. Energy Mater.* 2019, 9, 1803785.
- [S10] W. Zhu, Z. Zhang, W. Chai, Q. Zhang, D. Chen, Z. Lin, J. Chang, J. Zhang, C. Zhang, Y. Hao, *ChemSusChem* 2019, 12, 2318-2325.
- [S11] W. Chen, D. Li, S. Chen, S. Liu, Y. Shen, G. Zeng, X. Zhu, E. Zhou, L. Jiang, Y. Li, Y. Li, *Adv. Energy Mater.* 2020, 10, 2000851.
- [S12] C. Zhang, K. Wang, Y. Wang, W. S. Subhani, X. Jiang, S. Wang, H. Bao, L. Liu, L. Wan, S. Liu, *Solar RRL* 2020, 4, 2000254.

- [S13] Z. Zhang, F. He, W. Zhu, D. Chen, W. Chai, D. Chen, H. Xi, J. Zhang, C. Zhang, Y. Hao, *Sustainable Energy Fuels* 2020, 4, 4506-4515.
- [S14] J. Bian, Y. Wu, W. Bi, L. Liu, X. Su, B. Zhang, *Energy Fuels* 2020, 34, 11472-11478.
- [S15] Y. Guo, X. Yin, M. Que, J. Zhang, S. Wen, D. Liu, H. Xie, W. Que, *Organic Electron.* 2020, 86, 105917.
- [S16] X. Yin, Y. Guo, J. Liu, W. Que, F. Ma, K. Xu, *J. Phys. Chem. Lett.* 2020, 11, 7035-7041.
- [S17] W. Zhu, Q. Zhang, C. Zhang, Z. Zhang, D. Chen, Z. Lin, J. Chang, J. Zhang, Y. Hao, *ACS Appl. Energy Mater.* 2018, 1, 4991-4997.
